# Supplementary material
Source: PubMed Central journal article supplement (PMC5822437)
Supplement: NIHMS943010-supplement-Diniz-CS-2017-1368-Suppl.pdf [file NIHMS943010-supplement-Diniz-CS-2017-1368-Suppl.pdf]

## **Online Supplemental Material**

### **Materials and Methods**

#### **Primary Cardiomyocyte Cultures**

Neonatal rat cardiomyocyte cultures were prepared as previously described (Huang et al., *Circ Res* 2013;112:1234-43). Briefly, cardiomyocytes were isolated by enzymatic dissociation of one day old neonatal rat hearts using the Neonatal Cardiomyocyte Isolation kit (Cellutron, Life Technologies). Dissociated cells were plated for 2 hours to remove fibroblasts. The unattached cells were transferred to precoated plates containing medium supplemented with serum. Twenty-four hours after plating, cells were submitted to serum-free medium overnight. Cardiomyocyte cultures were transfected with 50 nM of miR-22 mimic duplex, miR-22 hairpin inhibitor and control oligonucleotide (Life Technologies) using Lipofectamine RNAiMAX transfection reagent. Six hours later, cells were treated with 50ng/ml of leptin (Sigma), which is a concentration sufficient to induce cardiomyocyte hypertrophy (Guedes et al., 2016). Cells were harvested 24 hours after leptin treatment for RNA isolation or 48 hours later for immunocytochemistry analyses.

#### **Quantitative analysis of DNA by real-time PCR**

Analysis of mitochondrial content in the heart and liver was performed using qPCR as previously described (Disatnik et al., *J Exp Med*. 2016;213:2655-2669). DNA isolation was performed using Proteinase K method. 0.625ng of DNA were used as templates for real-time PCR analysis. To detect nuclear DNA in the samples, we used GAPDH as a housekeeping gene. For assessment of mitochondrial DNA (mtDNA), we used NADH dehydrogenase 1 gene. PCR was performed using Sybr Select Master Mix (Applied Biosystems). Relative change in mtDNA content was calculated using the  $2^{-\Delta\Delta CT}$  method.

## Supplemental Data

### Supplemental Figure 1

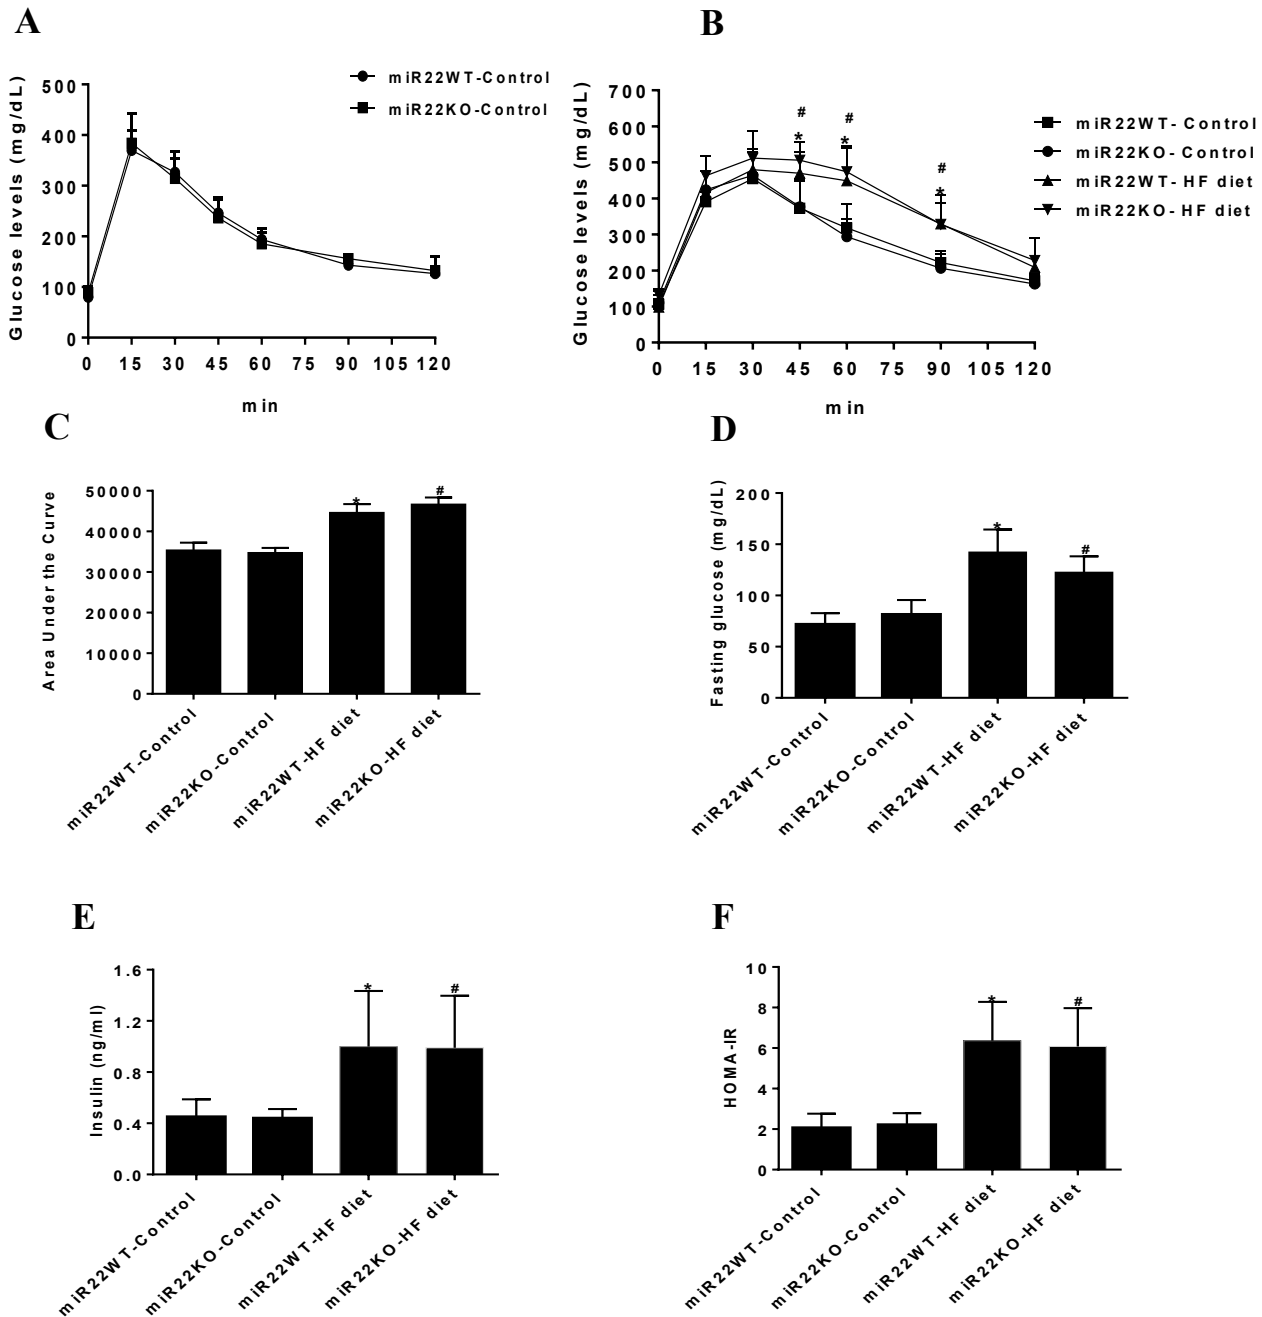

**Supplemental Figure 1.** (A) Intraperitoneal glucose tolerance test (iGTT) in miR-22WT and miR-22KO mice at 5 weeks of age fed control diet, before the treatment with different diets (n=8-10). (B) iGTT and; (C) area under the curve in miR22-WT and miR22-KO mice after 12 weeks of control diet and HF diet (n=6-7). (D) Fasting levels of glucose and; (E) insulin; (F) as well as HOMA-IR in miR22-WT and miR22-KO mice fed control diet and HF diet (n=5-7).

## Supplemental Figure 2

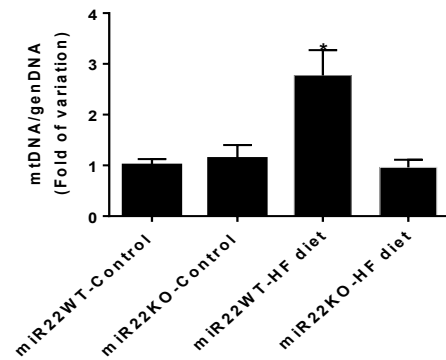

**Supplemental Figure 2.** Analysis of mitochondrial content in the liver of miR22-WT and miR22-KO mice fed control diet and HF diet, evaluated by qPCR (n=5-6). \* vs miR22WT-control (P<0.05).

### Supplemental Figure 3

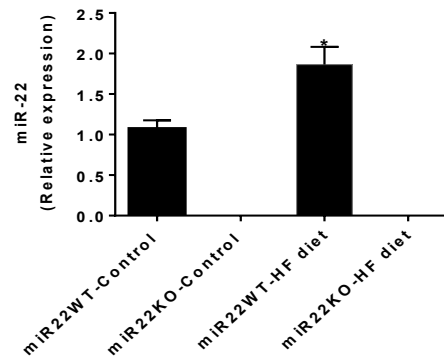

**Supplemental Figure 3.** miR-22 expression in the heart of miR22-WT and miR22-KO mice fed control diet and HF diet for 12 weeks, evaluated by qPCR (n=4-5). \* vs miR22WT-control (P<0.05).

## Supplemental Figure 4

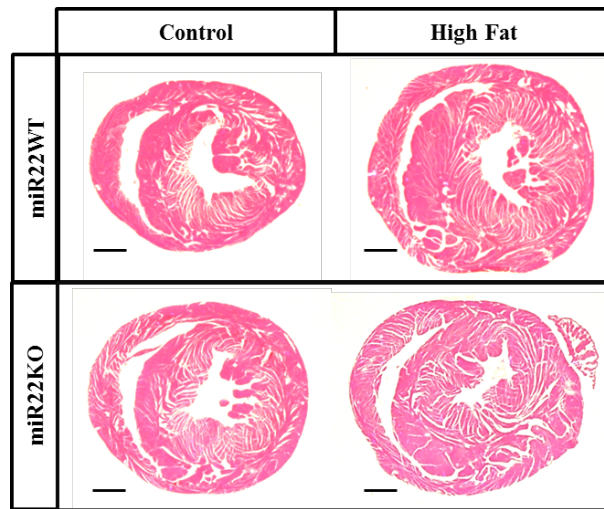

**Supplemental Figure 4.** Analysis of heart morphology in miR22-WT and miR22-KO mice fed control diet and HF diet for 12 weeks. Heart transverse sections were stained with Hematoxylin and eosin. Bars, 1 mm.

## Supplemental Figure 5

**A**

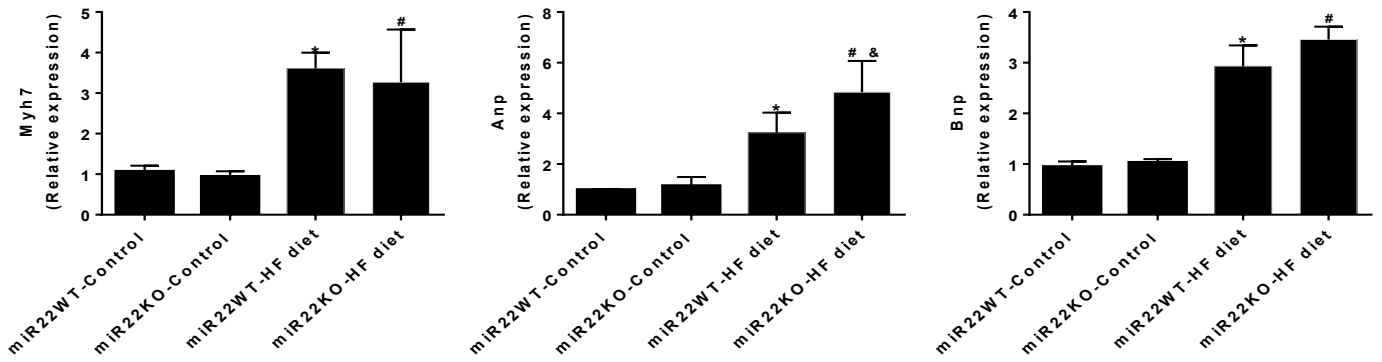

**B**

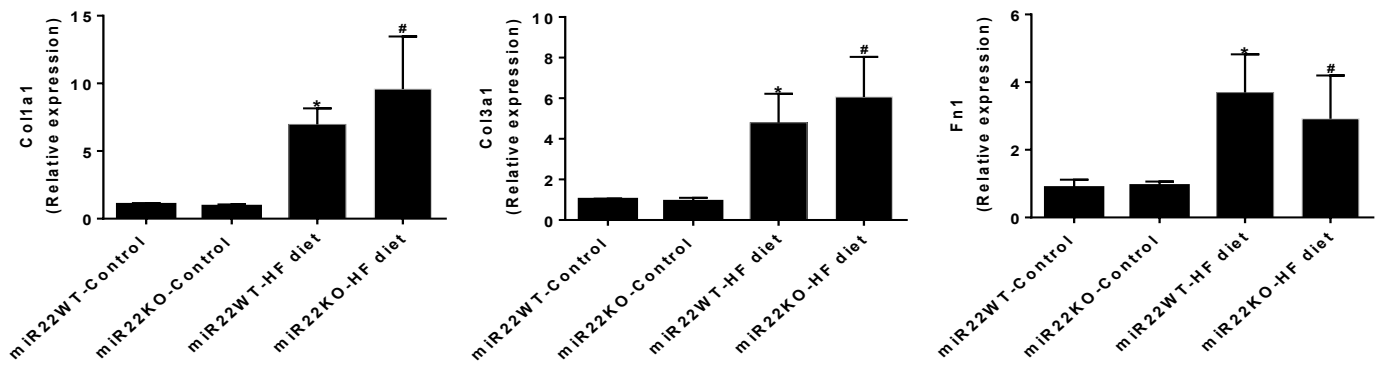

**Supplemental Figure 5.** (A) Analysis of mRNA levels of cardiac hypertrophy markers (Myh7, Anp and Bnp) and (B) fibrosis markers (Col1a, Col3a and Fn1) in the hearts of miR22-WT and miR22-KO mice fed control diet and HF diet, evaluated by qPCR (n=4-5).

## Supplemental Figure 6

### A

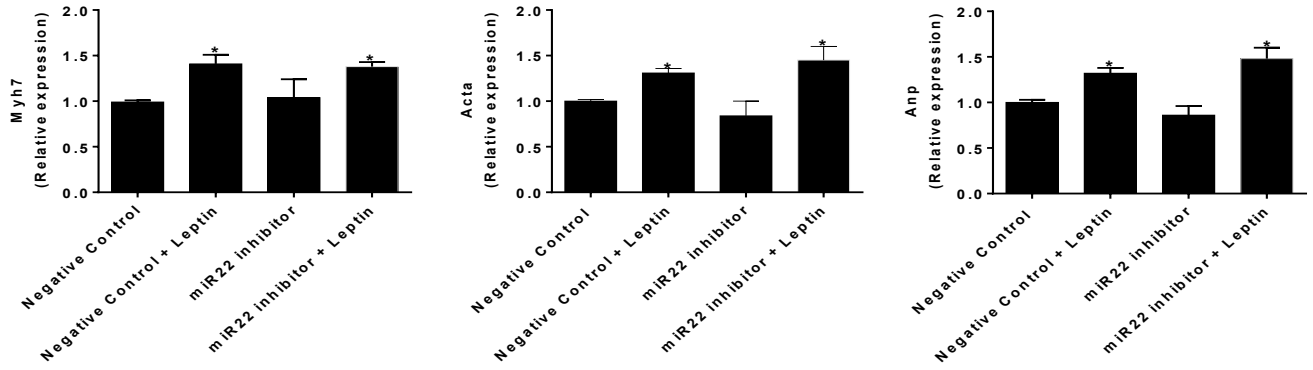

### B

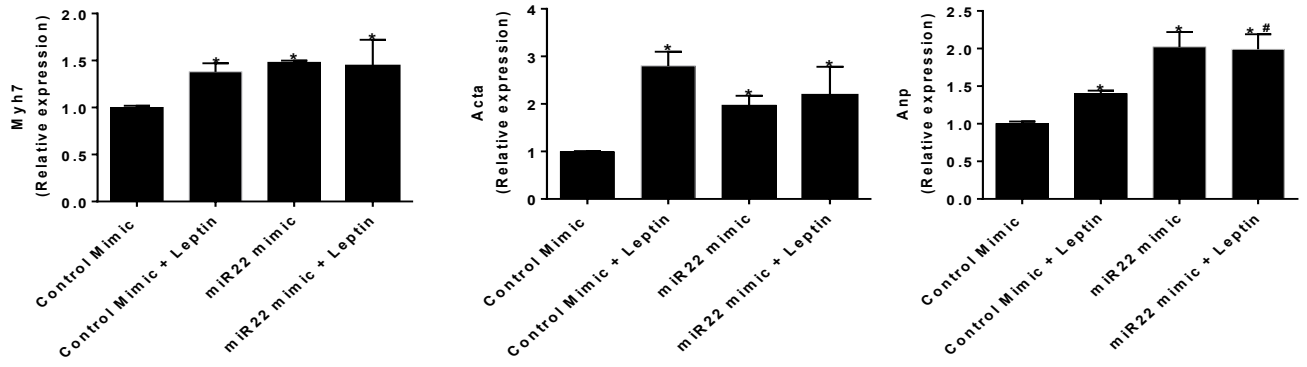

### C

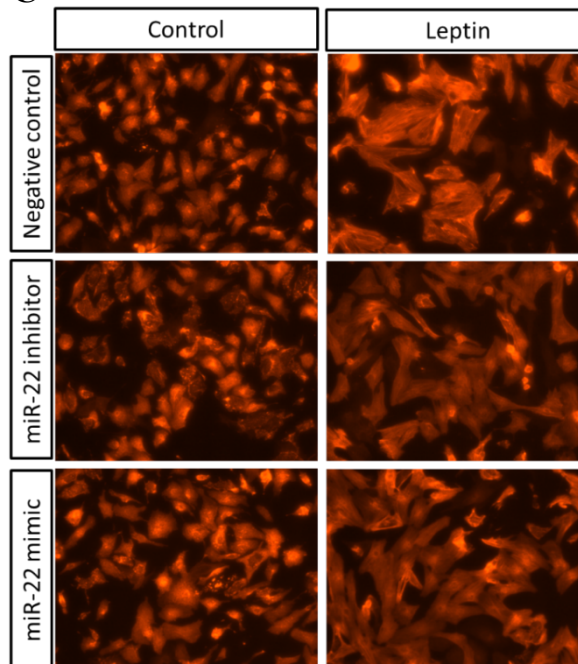

**Supplemental Figure 6.** (A) Analysis of the role of miR-22 in leptin-induced cardiomyocyte hypertrophy. For loss of function of miR-22, cardiomyocytes were treated with leptin (50ng/ml) combined with negative control (50nM) or miR-22 inhibitor (50nM) for 24 hours. (B) For gain of function of miR-22, cardiomyocytes were treated with leptin (50ng/ml) combined with control mimic (50nM) or miR-22 mimic (50nM) for 24 hours. Analysis of gene expression of Myh7, Acta and Anp was evaluated by qPCR (n=3). \* vs respective controls (P<0.05); # vs control mimic + leptin (P<0.05). (C) Some cardiomyocytes cultures were treated for 48 hours to perform immunochemistry for  $\alpha$ -actinin.



## Supplemental Figure 7

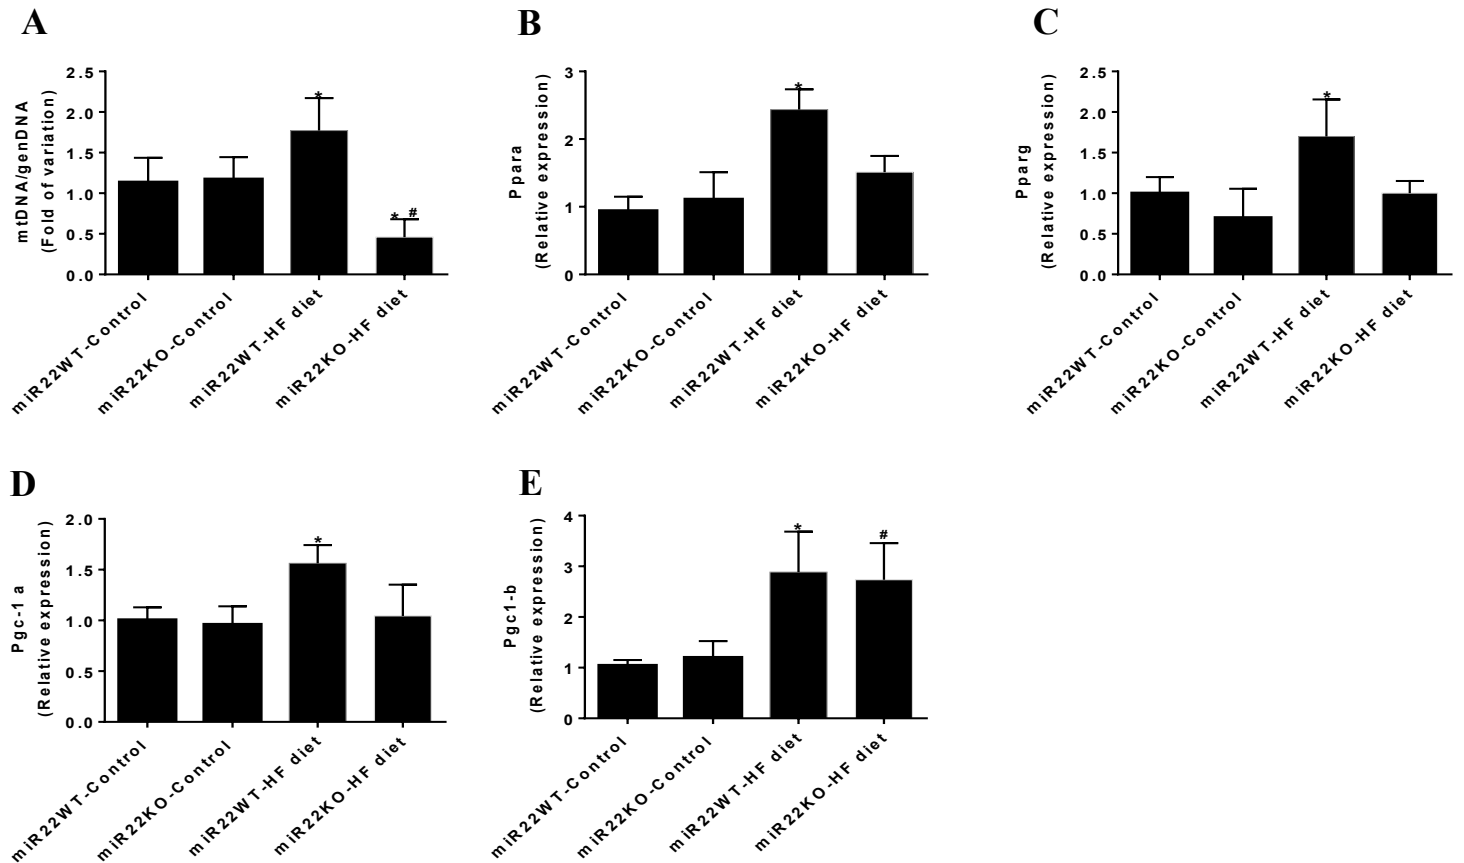

**Supplemental Figure 7.** (A) Analysis of mitochondrial content in the heart of miR22-WT and miR22-KO mice fed control diet and HF diet, evaluated by qPCR (n=5-6). (B-E) Analysis of gene expression of Ppara, Pparg, Pgc-1 $\alpha$  and Pgc-1 $\beta$  in the heart of miR22-WT and miR22-KO mice fed control diet and HF diet (n=5-6). \* vs miR22WT-control (P<0.05); # vs miR22KO-control (P<0.05).

**Supplemental Table 1**

|                                | <b>miR22WT-<br/>Control<br/>(n=7)</b> | <b>miR22KO-<br/>Control (n=7)</b> | <b>miR22WT-<br/>HF diet (n=7)</b> | <b>miR22KO-<br/>HF diet (n=7)</b> |
|--------------------------------|---------------------------------------|-----------------------------------|-----------------------------------|-----------------------------------|
| <b>Body weight (g)</b>         | 27.33±3.44                            | 25.20±1.92                        | 39.25±2.49                        | 39.61±5.19                        |
| <b>Liver (g)</b>               | 1.03±0.16                             | 1.11±0.16                         | 1.16±0.11 *                       | 1.13±0.12 #                       |
| <b>Epididymal fat (g)</b>      | 0.39±0.10                             | 0.46±0.26                         | 2.35±0.27 *                       | 1.68±0.37 #&                      |
| <b>Retroperitoneal fat (g)</b> | 0.33±0.19                             | 0.27±0.09                         | 0.75±0.12 *                       | 0.55±0.18 #                       |
| <b>Lungs (mg)</b>              | 196.27±39.13                          | 195.03±28.27                      | 207.32±37.59                      | 200.50±37.10                      |
| <b>Heart (mg)</b>              | 111.23±17.89                          | 119.38±8.71                       | 161.48±18.55 *                    | 157.92±15.22 #                    |

**Supplemental Table 1.** Morphometric parameters of miR22-WT and miR22-KO mice fed control diet and HF diet for 12 weeks. \* miR22WT-control (P<0.05); # vs miR22KO-control (P<0.05); & vs miR22WT-HF diet (P<0.05).

**Supplemental Table 2**

|                                | <b>miR22WT-<br/>Control<br/>(n=5)</b> | <b>miR22KO-<br/>Control (n=5)</b> | <b>miR22WT-<br/>HF diet (n=7)</b> | <b>miR22KO-<br/>HF diet (n=7)</b> |
|--------------------------------|---------------------------------------|-----------------------------------|-----------------------------------|-----------------------------------|
| <b>IVS;d (mm)</b>              | 0.52±0.11                             | 0.55±0.07                         | 0.58±0.07                         | 0.64±0.08                         |
| <b>IVS;s (mm)</b>              | 0.68±0.10                             | 0.75±0.09                         | 0.67±0.06                         | 0.71±0.19                         |
| <b>LVID;d (mm)</b>             | 2.37±0.69                             | 2.73±0.20                         | 2.37±0.54                         | 2.77±0.39                         |
| <b>LVID;s (mm)</b>             | 1.02±0.30                             | 1.31±0.33                         | 1.19±0.56                         | 1.44±0.43                         |
| <b>LVPW;d (mm)</b>             | 0.65±0.02                             | 0.64±0.04                         | 0.78±0.05 *                       | 0.83±0.10 #                       |
| <b>LVPW;s (mm)</b>             | 0.76±0.15                             | 0.80±0.18                         | 0.82±0.15                         | 0.97±0.17                         |
| <b>EF (%)</b>                  | 87.62±4.46                            | 83.83±8.71                        | 83.08±11.02                       | 78.94±10.49                       |
| <b>FS (%)</b>                  | 55.90±7.73                            | 52.17±9.97                        | 51.45±10.97                       | 48.31±10.17                       |
| <b>LV mass (mg)</b>            | 36.74±20.88                           | 46.24±6.98                        | 38.22±14.94                       | 59.19±16.80                       |
| <b>LV mass (Corrected, mg)</b> | 29.39±16.71                           | 36.99±5.59                        | 30.57±11.95                       | 47.35±13.44                       |
| <b>LV vol;d (ul)</b>           | 21.95±14.39                           | 28.10±5.06                        | 21.17±12.87                       | 29.64±10.77                       |
| <b>LV vol;s (ul)</b>           | 2.54±1.94                             | 4.69±3.31                         | 2.59±2.31                         | 4.61±2.17                         |
| <b>Heart rate (bpm)</b>        | 664.26±33.55                          | 654.30±23.54                      | 664.22±78.54                      | 634.08±73.30                      |

**Supplemental Table 2.** Echocardiographic analyses of miR22-WT and miR22-KO mice fed control diet and HF diet for 12 weeks. End-diastolic interventricular septum (IVS;d), end-systolic interventricular septum (IVS;s), end-diastolic left ventricular (LV) internal diameter (LVID;d), end-systolic LV internal diameter (LVID;s), LV end-diastolic posterior wall thickness (LVPW;d); LV end-systolic posterior wall thickness (LVPW;s); ejection fraction (EF), fractional shortening (FS), LV end-diastolic volume (LV vol;d), LV end-systolic volume (LV vol;s). \* miR22WT-control (P<0.05); # vs miR22KO-control (P<0.05).
